# Supplementary material
Source: PubMed Central journal article supplement (PMC4587305)
Supplement: NIHMS719402-supplement-2.pdf [file NIHMS719402-supplement-2.pdf]

1           **Genome analysis and polar tube firing dynamics of mosquito-infecting**  
2                                   **microsporidia**

3                                   **Emily R. Troemel<sup>1</sup>, James J. Becnel<sup>2</sup>**

4           1) Division of Biological Sciences, Section of Cell and Developmental Biology, University of  
5                                   California San Diego, 9500 Gilman Drive, La Jolla, CA 92093

6                                   2) USDA, ARS, CMAVE 1600 S.W. 23rd Drive Gainesville, FL 32608

7                                   **Correspondence:**

8                                   ERT - Email: [etroemel@ucsd.edu](mailto:etroemel@ucsd.edu); phone: 1-858-246-0708; fax: 1-858-822-3021

9                                   JJB - Email: [James.Becnel@ars.usda.gov](mailto:James.Becnel@ars.usda.gov); phone: 352-374-5961, fax: 352-374-5966

10           **Keywords:** Polar tube, microsporidia, *Edhazardia aedis*, *Vavraia culicis*, mosquito,  
11           genome sequence, *Aedes aegypti*

12  
13           **Manuscript length:**

14           Title:                                   10 words (max. 15)  
15           Abstract:                                   81 words (max. 100)  
16           Introduction:                                   1631 characters (incl. spaces, recommended max. 2000)  
17           Review part:                                   6560 characters (incl. spaces, recommended max. 4000)  
18           Conclusions:                                   1876 characters (incl. spaces; recommended 2000)  
19           References:                                   16 (max 10)  
20           Total (excl. Title page, Abstract, References, Figure and Video legends):  
21                                                                   10,091 characters (incl. spaces, recommended max 9000)

22           **Abbreviations:** Mb = megabase

23  
24           **Highlights**

- 25           • Review of genome sequences for two microsporidian species that infect mosquitoes
- 26           • Largest genome size reported to date for microsporidia, which characteristically have  
27           small genomes
- 28           • Video of the dynamics of polar tube firing in mosquito-infecting microsporidia

1 **Abstract**

2 Microsporidia are highly divergent fungi that are obligate intracellular pathogens of a  
3 wide range of host organisms. Here we review recent findings from the genome  
4 sequences of mosquito-infecting microsporidian species *Edhazardia aedis* and *Vavraia*  
5 *culicis*, which show large differences in genome size, although similar numbers of  
6 predicted genes. We also show a video of *E. aedis* polar tube firing, which is the  
7 dramatic mechanism used by microsporidia to deliver the germ cell (sporoplasm) into  
8 the host cell to initiate intracellular infection.

9

10 **1. Introduction**

11 The phylum Microsporidia contains over 1400 species of obligate intracellular  
12 pathogens that infect a wide range of hosts, from invertebrates to mammals (Vavra and  
13 Lukes, 2013). Microsporidia were originally proposed to be protozoans or 'ancient  
14 eukaryotes', but with a growing database of genome sequence information it has  
15 become clear they are most closely related to fungi. Recent phylogenomic analyses  
16 have placed them together with the Cryptomycota as the earliest branching clade in the  
17 fungal kingdom (James et al., 2013). Microsporidia have dramatic mechanisms of  
18 invasion into their host cells with a polar tube infection apparatus that is used to deliver  
19 a cell wall-deficient 'sporoplasm' into the host cell (Xu and Weiss, 2005). This dramatic  
20 polar tube 'firing' has been described for several species of microsporidia and previous  
21 studies have described which conditions will induce germination for various species.  
22 While the dynamics of polar tube firing have been described before (Frixione et al.,  
23 1997), this report represents the first video publication of this dramatic event specific to

1 the phylum Microsporidia. In particular, we show a video of polar tube firing of the  
2 mosquito-infecting species *Edhazardia aedis*, which has recently been subjected to  
3 genome analysis, together with another mosquito-infecting species *Vavraia culicis*  
4 (Desjardins et al., 2015). By describing these recent genomic and transcriptomic  
5 findings, together with a video of the most distinctive feature of microsporidia, we aim to  
6 facilitate understanding and increase exposure for these ubiquitous, but poorly  
7 understood parasites.

8

## 9 **2. Genomic and transcriptomic analysis of mosquito-infecting microsporidian** 10 **species *E. aedis* and *V. culicis***

11 For more than 100 years microsporidia have been studied in mosquitoes because they  
12 are excellent model systems to investigate applied studies such as use for biocontrol or  
13 in basic studies to resolve complex developmental cycles and host-pathogen  
14 relationships (Becnel et al., 2005). Two microsporidian species in particular have been  
15 studied for their ability to infect mosquitoes: *E. aedis*, which is a specialist species that  
16 specifically infects the yellow fever mosquito *Aedes aegypti*, and *V. culicis*, which is a  
17 generalist species that infects a wide range of mosquito species including important  
18 *Anopheles* spp. that vector malaria. Recent genomic and transcriptomic analysis has  
19 demonstrated interesting differences and similarities between these species.

20 Surprisingly, the *E. aedis* genome is 51.3 Mb, which almost 10-fold larger than the 6.1  
21 Mb *V. culicis* genome (Table 1). As such, the *E. aedis* genome represents the largest  
22 microsporidian genome sequenced to date. Previously, the largest genome reported  
23 was 25 Mb (Corradi et al., 2009). Microsporidian genomes are famous for their

1 reduction and compaction, with the human-infecting microsporidian species  
2 *Encephalitozoon intestinalis* having the smallest known eukaryotic genome at 2.3 Mb.  
3 The increase in *E. aedis* genome size is not due to repetitive sequence, but rather due  
4 to expansion of AT-rich intergenic regions, perhaps suggesting additional regulation of  
5 gene expression. Although the *E. aedis* genome is much larger than the genomes of *V.*  
6 *culicis* and other microsporidian species, it has only about a 1.5-fold increase in gene  
7 content with 4190 predicted genes. This is in comparison to 2773 predicted genes in *V.*  
8 *culicis*, which is similar to the number of predicted genes in microsporidian species that  
9 infect humans, insects and nematodes (Table 1). These findings are similar to other  
10 microsporidian genomes, where an increase in genome size does not appear to be  
11 accompanied by a similar increase in magnitude of the predicted proteome size.  
12 Interestingly, the increased gene content in *E. aedis* appears not to be due to retention  
13 of genes from the last common ancestor shared with true fungi, but rather due to  
14 species-specific expansion of genes, which has been observed in the genomes of other  
15 microsporidian species.

16 In addition to genome sequencing of these two microsporidian species, transcriptomic  
17 analysis was performed on various stages of the microsporidian life cycle (Desjardins et  
18 al., 2015). In the simplest overview, the microsporidian life cycle begins with the  
19 horizontally transmissible spore form, which fires its polar tube in the midgut to invade  
20 host cells, where it replicates intracellularly and eventually differentiates back into  
21 spores that escape back into the environment. Different microsporidian species have  
22 more complex versions of this cycle, involving horizontal or vertical transmission, and  
23 sometimes multiple forms of replicative cells, which we do not discuss here because of

1 space constraints. In general, transcriptomic analysis of the spores of *E. aedis* and *V.*  
2 *culicis* indicated similar gene expression, with primarily expression of genes that encode  
3 ribosomal proteins and Hsp70 domain proteins, indicating a focus of these spores on  
4 protein production and protein folding. In contrast, there were very distinct expression  
5 patterns in the replicative forms of *E. aedis* and *V. culicis*, with genes upregulated in *E.*  
6 *aedis* enriched for Gene Ontology (GO) terms for growth, carbohydrate metabolism and  
7 DNA replication, as well as genes of unknown function that are predicted to encode  
8 secreted proteins. Genes upregulated in the replicative form of *V. culicis* were enriched  
9 for GO terms for protein modification and trafficking, whereas there was not an  
10 enrichment in genes predicted to encode secreted proteins. These differences may  
11 reflect the specialist vs. generalist lifestyles of *E. aedis* and *V. culicis*, with the specialist  
12 *E. aedis* involved in a host/pathogen arms race with its mosquito host *Ae aegypti*.

13

### 14 **3. Kinetics of polar tube firing in *E. aedis***

15 One of the most distinctive features of microsporidia is the polar tube infection  
16 apparatus. Traditionally this structure has been called the polar filament when coiled  
17 within the spore, and then has been referred to as a polar tube outside the spore after it  
18 everts. For simplicity, here we will refer to it as the polar tube. The polar tube is coiled  
19 inside of the transmissible spore form until it receives a stimulus, at which point it fires  
20 dramatically and everts outside of the spore, in an event called germination. This tube is  
21 thought to pierce a host cell and then inject a single microsporidian parasite directly into  
22 that cell, although there is evidence that invasion can also occur through phagocytosis  
23 ((Leitch et al., 2005) and references therein). There are a variety of stimuli that have

1 been shown to induce polar tube firing, with different conditions used for different  
2 species. Polar tube firing characterization has been performed with mosquito-infecting  
3 microsporidia because of the size of spores and ease of germination in vitro. Previous  
4 studies have characterized in detail the conditions that will induce *Edhazardia*  
5 germination (Undeen and Becnel, 1992). In particular, this event is influenced by both  
6 the type of cation present and the pH, with the optimal germination conditions identified  
7 to be 0.1M KCl at pH10.5-11, although germination can also be triggered with other  
8 monovalent ions. Here we show the dynamics of this polar tube firing in *E. aedis* spores  
9 treated with 0.1M KCl pH10.5-11 (Video File 1). Interestingly, the digestive tract of the  
10 mosquito has a pH range that should facilitate firing in the anterior-central midgut,  
11 where *E. aedis* commonly germinates to infect gastric caecal cells (Figure 1). While the  
12 underlying mechanisms of this dramatic event remain poorly understood, the firing can  
13 be divided into several distinct phases, including 1) activation, 2) increase in intrasporal  
14 osmotic pressure, 3) eversion of the polar tube outside the spore, and 4) passage of  
15 sporoplasm through the polar tube. A clear event shown in the last frames of this video  
16 is the expanding posterior vacuole that appears to push the spore contents into the  
17 everted polar tube. This video should provide a useful resource for presentations and  
18 analysis of this dramatic polar tube firing event that characterizes the microsporidia.

19

#### 20 **4. Conclusions**

21 Microsporidia are morphologically quite distinct from fungi but share a number of traits  
22 including spore formation, chitin as a component of the spore wall, the presence of  
23 trehalose, and a closed mitosis (Vavra and Lukes, 2013). These characters are not

1 unique to the fungi and microsporidia (some occur in a number of protist groups) but a  
2 more definitive link between the two groups has been made with genome sequencing.  
3 Several phylogenomic comparisons between fungi and microsporidia have concluded  
4 that the microsporidia can best be considered the earliest diverging branch of fungi or  
5 their sister group (Vavra and Lukes, 2013). The new findings in genome sequence and  
6 transcriptional analysis for these two divergent microsporidian species from mosquitoes  
7 provides additional information to understand core microsporidian genes and pathways  
8 as well as specific adaptations to different hosts by both generalist and specialist  
9 species.

10

11 The environmental spores of *E. aedis* demonstrated in this video contain an injection  
12 apparatus composed of a polar filament, polaroplast and posterior vacuole. It is  
13 generally thought that germination is an osmotic event with various stimuli (pH shifts,  
14 ion concentrations etc.) that results in tremendous internal pressure (for *E. aedis* ~40  
15 atmospheres). The spores rupture at the apex and the filament is expelled and everted  
16 to become a tube through which the spore contents are forced out, likely by the  
17 expanding posterior vacuole, and released at the tip (Video File 1). There remain many  
18 unanswered questions including the dynamics and factors that cause spore  
19 germination, as well as the very basic aspects of the manner in which the polar tube  
20 penetrates/enters the host cell. The recently acquired genome information coupled with  
21 functional studies should shed light on this intriguing invasion process common to  
22 microsporidia.

23

24

1 **Table 1.** Genome size and predicted gene number for several microsporidian species

2

| Species                             | Host                               | Genome size (Mb) | Predicted gene number | Reference                 |
|-------------------------------------|------------------------------------|------------------|-----------------------|---------------------------|
| <i>Edhazardia aedis</i>             | yellow fever mosquito <i>Aedes</i> | 51.3             | 4190                  | (Desjardins et al., 2015) |
| <i>Vavraia culicis</i>              | wide range of mosquito species     | 6.1              | 2773                  | (Desjardins et al., 2015) |
| <i>Enterocytozoon bieneusi</i>      | humans                             | ~6               | 3804                  | (Akiyoshi et al., 2009)   |
| <i>Encephalitozoon intestinalis</i> | humans                             | 2.3              | 1833                  | (Corradi et al., 2010)    |
| <i>Encephalitozoon cuniculi</i>     | humans                             | 2.9              | 1999                  | (Katinka et al., 2001)    |
| <i>Nosema ceranae</i>               | honey bees                         | 7.86             | 2614                  | (Cornman et al., 2009)    |
| <i>Spraguea lophii</i>              | fish                               | 6.2 to 7.3       | 2573                  | (Campbell et al., 2013)   |
| <i>Trachipleistophora hominis</i>   | humans                             | 8.5 – 11.6       | 3266                  | (Heinz et al., 2012)      |
| <i>Nematocida parisii</i>           | <i>Caenorhabditis</i> nematodes    | 4.1              | 2661                  | (Cuomo et al., 2012)      |
| <i>Nematocida</i> sp1               | <i>Caenorhabditis</i> nematodes    | 4.7              | 2770                  | (Cuomo et al., 2012)      |

3

4 **Acknowledgements**

5 E.R.T. acknowledges support from NIAID R01 AI087528. J.J.B. acknowledges support  
6 from the USDA-Agricultural Research Service and Neil Sanscrainte for video editing.

7

8



## 1 References

- 2 Akiyoshi, D.E., Morrison, H.G., Lei, S., Feng, X., Zhang, Q., Corradi, N., Mayanja, H., Tumwine,  
3 J.K., Keeling, P.J., Weiss, L.M., *et al.* (2009). Genomic survey of the non-cultivable  
4 opportunistic human pathogen, *Enterocytozoon bieneusi*. *PLoS pathogens* 5, e1000261.
- 5 Becnel, J.J., White, S.E., and Shapiro, A.M. (2005). Review of microsporidia-mosquito  
6 relationships: from the simple to the complex. *Folia Parasitol (Praha)* 52, 41-50.
- 7 Campbell, S.E., Williams, T.A., Yousuf, A., Soanes, D.M., Paszkiewicz, K.H., and Williams, B.A.  
8 (2013). The genome of *Spraguea lophii* and the basis of host-microsporidian interactions.  
9 *PLoS genetics* 9, e1003676.
- 10 Cornman, R.S., Chen, Y.P., Schatz, M.C., Street, C., Zhao, Y., Desany, B., Egholm, M.,  
11 Hutchison, S., Pettis, J.S., Lipkin, W.I., *et al.* (2009). Genomic analyses of the  
12 microsporidian *Nosema ceranae*, an emergent pathogen of honey bees. *PLoS pathogens* 5,  
13 e1000466.
- 14 Corradi, N., Haag, K.L., Pombert, J.F., Ebert, D., and Keeling, P.J. (2009). Draft genome  
15 sequence of the *Daphnia* pathogen *Octosporea bayeri*: insights into the gene content of a  
16 large microsporidian genome and a model for host-parasite interactions. *Genome biology*  
17 10, R106.
- 18 Corradi, N., Pombert, J.F., Farinelli, L., Didier, E.S., and Keeling, P.J. (2010). The complete  
19 sequence of the smallest known nuclear genome from the microsporidian *Encephalitozoon*  
20 *intestinalis*. *Nat Commun* 1, 77.
- 21 Cuomo, C.A., Desjardins, C.A., Bakowski, M.A., Goldberg, J., Ma, A.T., Becnel, J.J., Didier,  
22 E.S., Fan, L., Heiman, D.I., Levin, J.Z., *et al.* (2012). Microsporidian genome analysis  
23 reveals evolutionary strategies for obligate intracellular growth. *Genome Res* 22, 2478-2488.
- 24 Desjardins, C.A., Sanscrainte, N.D., Goldberg, J.M., Heiman, D., Young, S., Zeng, Q., Madhani,  
25 H.D., Becnel, J.J., and Cuomo, C.A. (2015). Contrasting host-pathogen interactions and  
26 genome evolution in two generalist and specialist microsporidian pathogens of mosquitoes.  
27 *Nat Commun* 6, 7121.
- 28 Frixione, E., Ruiz, L., Cerbon, J., and Undeen, A.H. (1997). Germination of *Nosema algerae*  
29 (*Microspora*) spores: conditional inhibition by D<sub>2</sub>O, ethanol and Hg<sup>2+</sup> suggests dependence  
30 of water influx upon membrane hydration and specific transmembrane pathways. *The*  
31 *Journal of eukaryotic microbiology* 44, 109-116.
- 32 Heinz, E., Williams, T.A., Nakjang, S., Noel, C.J., Swan, D.C., Goldberg, A.V., Harris, S.R.,  
33 Weinmaier, T., Markert, S., Becher, D., *et al.* (2012). The genome of the obligate  
34 intracellular parasite *Trachipleistophora hominis*: new insights into microsporidian genome  
35 dynamics and reductive evolution. *PLoS pathogens* 8, e1002979.
- 36 James, T.Y., Pelin, A., Bonen, L., Ahrendt, S., Sain, D., Corradi, N., and Stajich, J.E. (2013).  
37 Shared signatures of parasitism and phylogenomics unite Cryptomycota and microsporidia.  
38 *Curr Biol* 23, 1548-1553.
- 39 Katinka, M.D., Duprat, S., Cornillot, E., Metenier, G., Thomarat, F., Prensier, G., Barbe, V.,  
40 Peyretailade, E., Brottier, P., Wincker, P., *et al.* (2001). Genome sequence and gene  
41 compaction of the eukaryote parasite *Encephalitozoon cuniculi*. *Nature* 414, 450-453.
- 42 Leitch, G.J., Ward, T.L., Shaw, A.P., and Newman, G. (2005). Apical spore phagocytosis is not  
43 a significant route of infection of differentiated enterocytes by *Encephalitozoon intestinalis*.  
44 *Infection and immunity* 73, 7697-7704.
- 45 Undeen, A.H., and Becnel, J.J. (1992). Longevity and Germination of *Edhazardia aedis*  
46 (*Microspora*: *Amblyosporidae*) Spores. *Biocontrol Science and Technology* 2, 247-256.
- 47 Vavra, J., and Lukes, J. (2013). Microsporidia and 'the art of living together'. *Advances in*  
48 *parasitology* 82, 253-319.

1 Xu, Y., and Weiss, L.M. (2005). The microsporidian polar tube: a highly specialised invasion  
2 organelle. *Int J Parasitol* 35, 941-953.

3

4

### 5 **Video legend**

6 1 ml of buffer containing 25mM NaHCO<sub>3</sub>, 18mM NaOH and 100mM KCl was added to a  
7 microfuge tube and warmed at 30°C for 5 minutes. 10<sup>6</sup> *E. aedis* spores were then  
8 added to the tube, and then 20 µl of this mixture was pipetted onto a microscope slide  
9 and covered with an 18 X 18-mm cover slip for imaging. Fresh spores are 8.4 µm by 4.5  
10 µm. The germination process from activation to full polar tube extension occurs in 1-2  
11 seconds and the polar tube (annotated as polar filament in the video) travels at about  
12 100 µm per second. 0-14 second segment: low magnification of germinating spores  
13 (scale bar 10 µm), yellow arrows follow the path of the everted polar tube and release of  
14 the sporoplasms; 15-27 second segment: high magnification of germinating spores  
15 (scale bar 10 µm) demonstrating the expansion of the posterior vacuole (PV) that forces  
16 the spore contents through the polar tube.

17

### 18 **Figure legend of *Ae. aegypti* digestive gut**

19 Dissected alimentary canal from a larva of *Aedes aegypti* indicating the pH shifts in  
20 each region from anterior to posterior. Spores enter through the esophagus and are  
21 carried to the midgut where they encounter digestive enzymes and pH shifts that  
22 contribute to initiating the germination process.

23
